# Supplementary material for: Cellular miR-6741-5p as a Prognostic Biomarker Predicting Length of Hospital Stay among COVID-19 Patients
Source: MDPI journal article supplement (doi:10.3390/v14122681), 2022-11-30
Supplement: s1 [file s1]

## SUPPLEMENTAL SECTION

### **Cellular miR-6741-5p as a Prognostic Biomarker Predicting Length of Hospital Stay among COVID-19 Patients**

Shaw M. Akula <sup>1,2,\*</sup>, John F. Williams <sup>1</sup>, Lok R. Pokhrel <sup>3</sup>, Anais N. Bauer <sup>1</sup>, Smit Rajput <sup>2</sup> and Paul P. Cook <sup>2</sup>

<sup>1</sup> Department of Microbiology & Immunology, Brody School of Medicine, East Carolina University, Greenville, NC 27834, USA

<sup>2</sup> Department of Internal Medicine, Brody School of Medicine, East Carolina University, Greenville, NC 27834, USA

<sup>3</sup> Department of Public Health, Brody School of Medicine, East Carolina University, Greenville, NC 27834, USA

\* Correspondence: akulas@ecu.edu

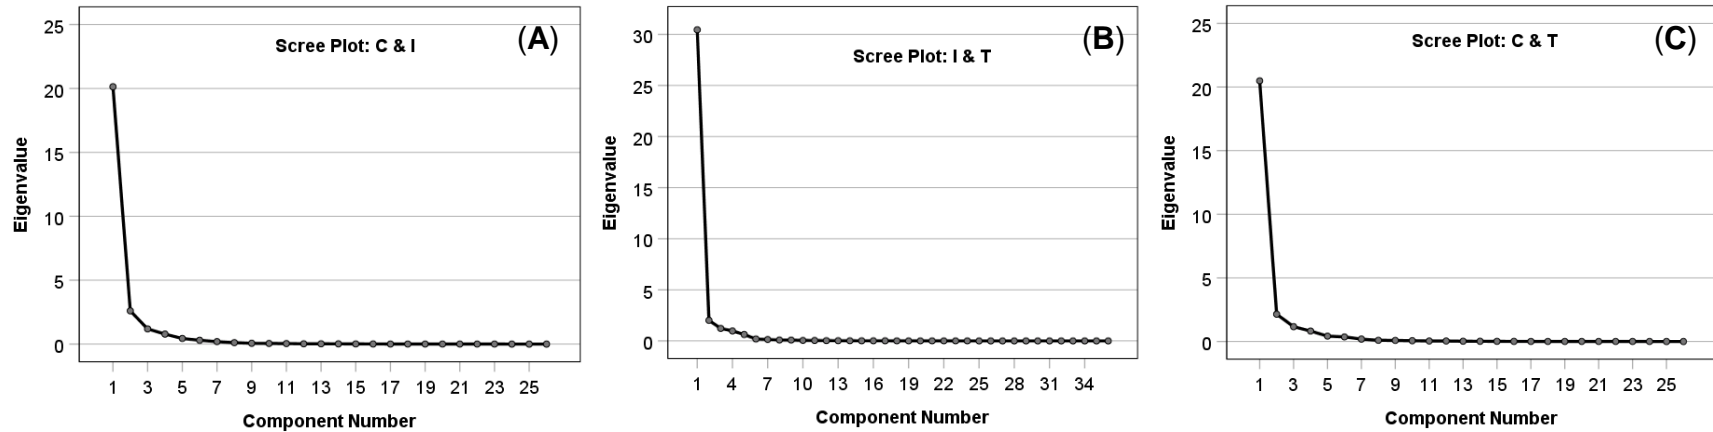

**Supplementary Figure S1. Scree plots showing eigenvalues for the principal component presented in Figure 1.** (A-C) Scree Plot showing eigenvalues on the Y-axis and the number of factors on the X- axis for transcriptome differences between miRNA expression in I, T, and C groups of COVID-19 patients. All three scree plots show that the first two factors (principal components [PC] 1 and 2) are to be considered in the principal component analysis, and accordingly we have plotted PC1 vs PC2 between the groups: C & I (A), I & T (B), and C & T (C) in Figure 1 in the main text. **C** denotes healthy volunteers, **I** denotes COVID-19 patients treated with remdesivir (an antiviral) plus dexamethasone (a glucocorticoid) (with or without baricitinib, a Janus kinase inhibitor) on the day of hospitalization, and **T** denotes COVID-19 patients at 48h post treatment.

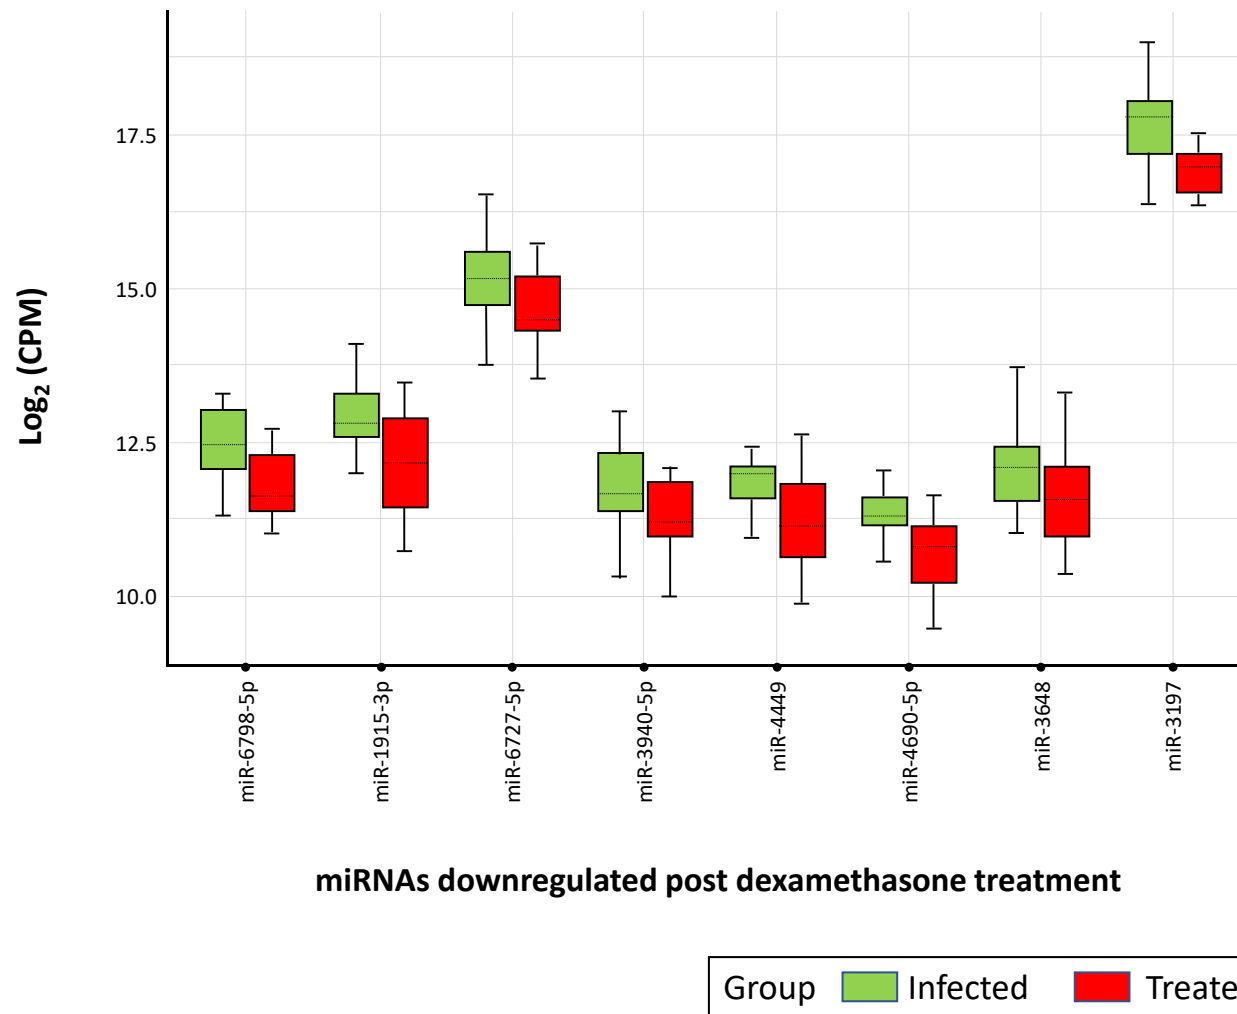

**Supplementary Figure S2. Boxplots of the 8 miRNAs downregulated in COVID-19 patients with moderate-severe illness at 48h post treatment.** Screening of 2083 human miRNA transcripts using extraction-free HTG EdgeSeq system determined 8 differentially expressed circulating miRNAs in the plasma of COVID-19 patients on the day of hospitalization (Infected) and 48h post treatment (Treated).

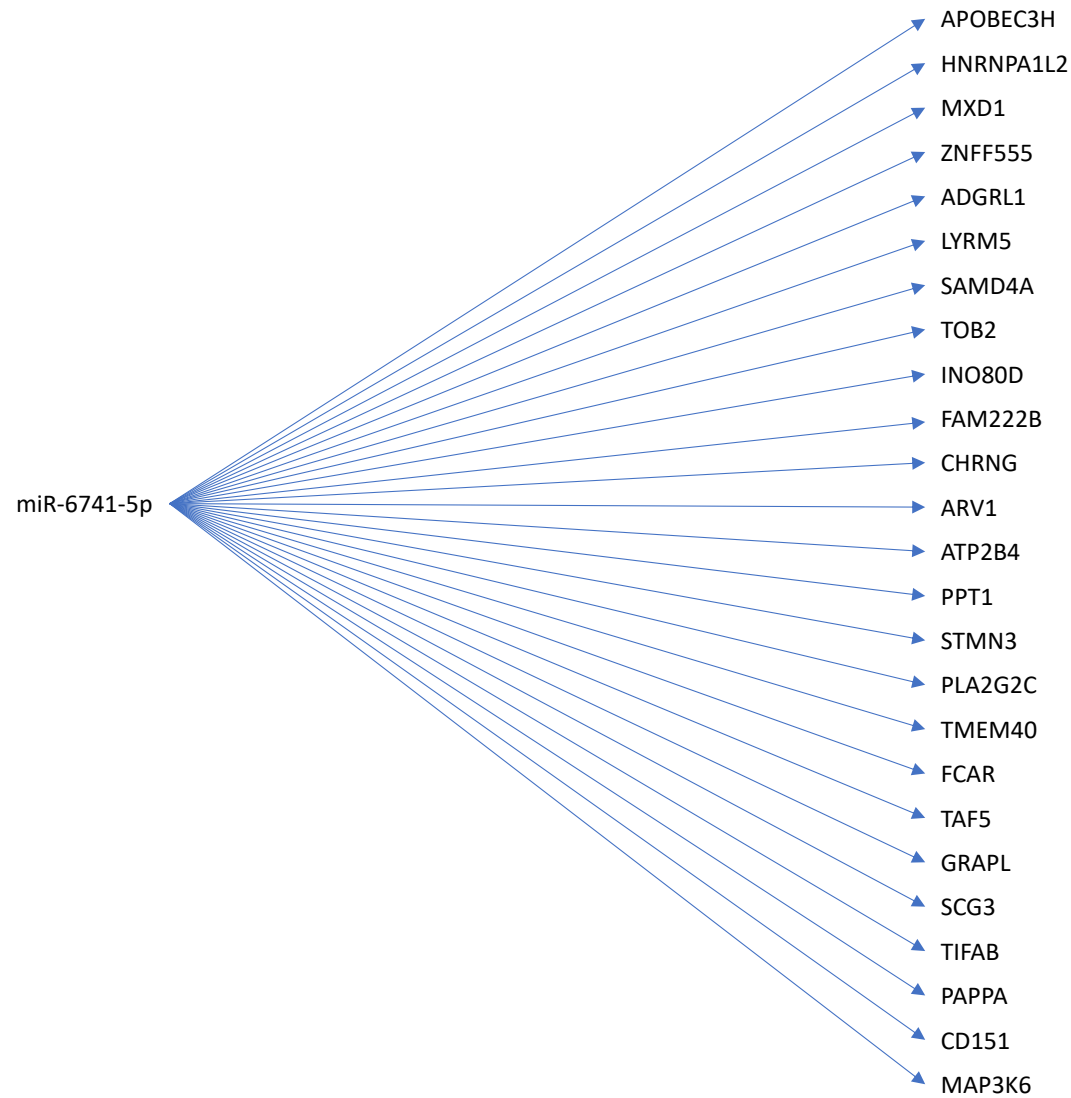

**Supplemental Figure S3.** Putative target genes for miR-6741-5p. miR-6741-5p has been predicted to modulate expression of at least 25 target genes. miRDB and TargetScan tools were used for prediction of miR-6741-5p target genes.

|                                      |                                                                             |
|--------------------------------------|-----------------------------------------------------------------------------|
| Position 269-275 of HNRNPA1L2 3' UTR | 5 ' ...UAGAUUUUUUUUUUUGCACCCAU...                                           |
| <a href="#">hsa-miR-6741-5p</a>      | <div style="text-align: center;">         </div> 3 ' GUGCCGAGGGUGGUCGUGGGUG |

|                                   |                                                                             |
|-----------------------------------|-----------------------------------------------------------------------------|
| Position 24-31 of APOBEC3H 3' UTR | 5 ' ...AUCUACUGGAACAUAGCACCCAA...                                           |
| <a href="#">hsa-miR-6741-5p</a>   | <div style="text-align: center;">         </div> 3 ' GUGCCGAGGGUGGUCGUGGGUG |

**Supplementary Figure S4.** RNA hybrid analysis shows miR-6741-5p binding site in 3';-UTR of HNRNPA1L2 and APOBEC3H mRNA. This is predicted using miRDB and TargetScan algorithms [14,15].

**Supplementary Table S1:** Oligos used in the luciferase assay.

| Name                              | Sequence                                   |
|-----------------------------------|--------------------------------------------|
| hsa-miR-6741-5p mimic             | gugggugcuggugggagccgug                     |
| miR-NC                            | ucacaaccuccuagaaagaguaga                   |
| WT human HNRNPA1L2 3'UTR sequence | AAAGTGttttaatgtagatttttttttgcacccat.....   |
| WT human APOBEC3H 3'UTR sequence  | CTCGAGgtcacccaatctactggaacatagcacccaa..... |
| human APOBEC3H 3'UTR Mutant-1     | CTCGAGGtaccctactctactggaacatagcacccaa..... |
| human APOBEC3H 3'UTR Mutant-2     | CTCGAGGtcacccaatctactggaacatacaaacgcc..... |
| human APOBEC3H 3'UTR Mutant-1&2   | CTCGAGGtaccctactctactggaacatacaaacgcc..... |

 miRNA binding sequence

 Mutated sequence

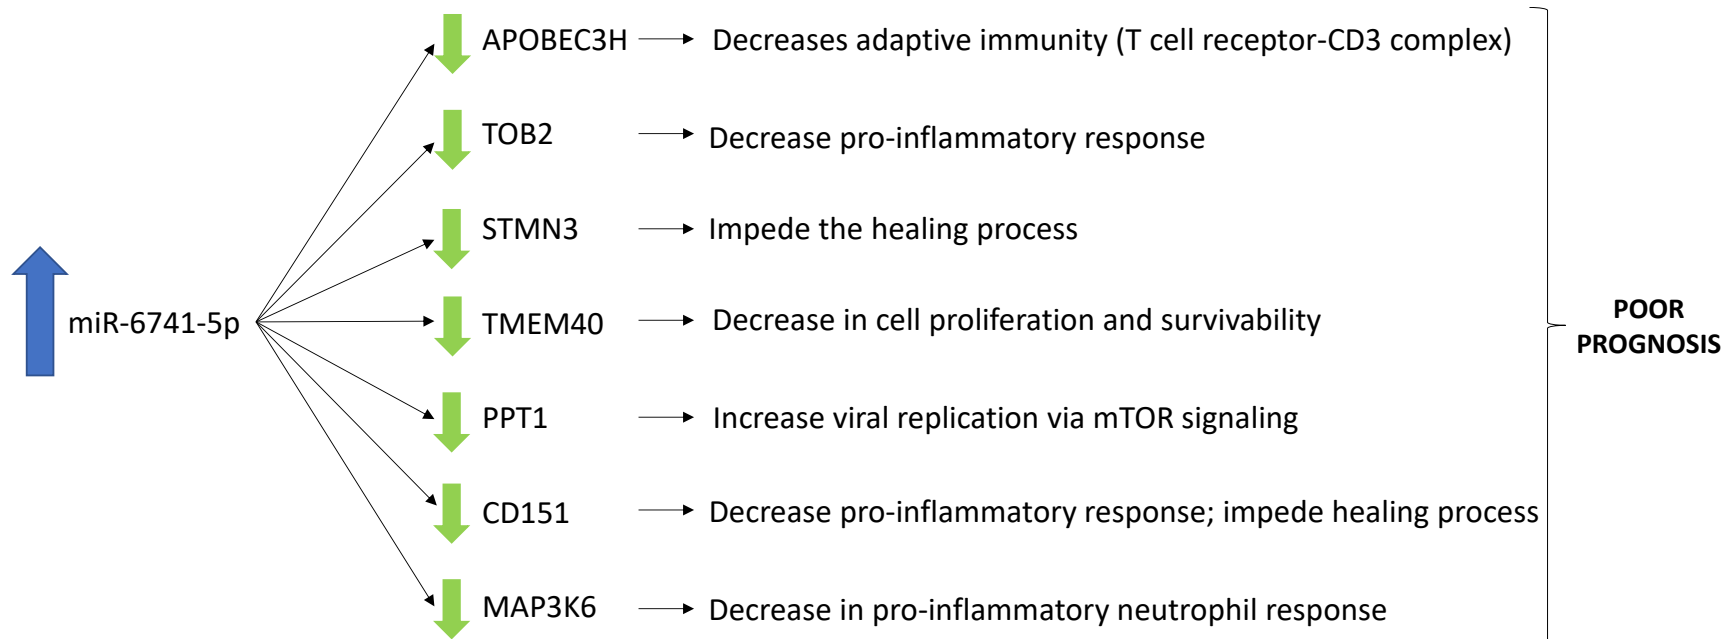

**Supplemental Figure S5.** The net effect of a sudden surge of miR-6741-5p in the COVID-19 patients (Jiang et al., 2020; Leonard et al., 2016; Liu et al., 2020; Mazzocca et al., 2002; Meissner et al., 2022; Mondal et al., 2022; Nair et al., 2014; Tartey et al., 2018; Yu et al., 2021).

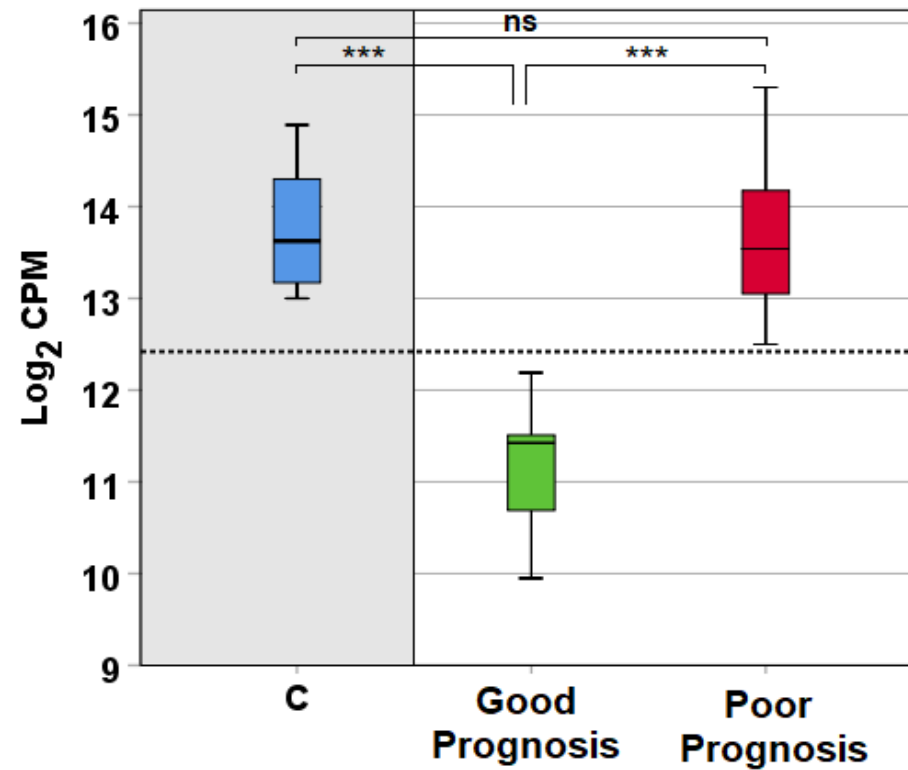

**Supplemental Figure S6.** Statistical comparison of the miR-6741-5p expression in healthy volunteer group (C) compared to COVID-19 patients at 48h post treatment.



**Supplemental Table S2:** Clinical biomarker levels during the course of treating COVID-19.

|        |                           | CRP VALUES |      |      | ALC  | Ferritin |      |      | D dimer |       |      | MEDICAL INTERVENTIONS |                   |                        |                               |                      |                            | miR-6741-5p expression |                           |                                     |  |
|--------|---------------------------|------------|------|------|------|----------|------|------|---------|-------|------|-----------------------|-------------------|------------------------|-------------------------------|----------------------|----------------------------|------------------------|---------------------------|-------------------------------------|--|
| I<br>D | Co-morbidity              | D 01       | D 02 | D 04 | D 01 | D 01     | D 02 | D 04 | D 01    | D 02  | D 04 | Ds on MV *            | D when put on MV* | Max O <sub>2</sub> (%) | D when given O <sub>2</sub> ? | Ds on O <sub>2</sub> | Log <sub>2</sub> CPM value |                        | Pred (based on CPM value) | LOS                                 |  |
|        |                           |            |      |      |      |          |      |      |         |       |      |                       |                   |                        |                               |                      | D0                         | D02                    |                           |                                     |  |
| A      | HTN, paraplegia           | 70         | 43   | 180  | 0.7  | 2419     | 6858 | 8098 | 3172    | 1866  |      | 0                     | NA                | 28                     | 1                             | 3                    | 9.5                        | 11.5                   | G                         | Discharged on day 4                 |  |
| B      | HTN, DM, obesity          |            | 130  |      | 0.83 |          |      |      | 1278    | 75951 |      | 0                     | NA                | 100                    | 1                             | 3                    | 10.4                       | 11.5                   | G                         | Discharged on day 4                 |  |
| C      | HTN, asthma, DM, obesity  | 220        | 202  | 126  | 0.4  | 205      |      |      | 1273    |       |      | 0                     | NA                | 28                     | 1                             | 4                    | 8.9                        | 10.7                   | G                         | Discharged on day 5                 |  |
| D      | DM                        |            | 43   |      | 0.92 | 327      |      |      | 3328    |       |      | 0                     | NA                | 100                    | 2                             | 15                   | 11.4                       | 13.2                   | P                         | Dead on day 16                      |  |
| E      | Renal transplant, HTN, DM |            |      |      | 0.27 |          |      |      | 876     |       |      | 0                     | NA                | 44                     | 1                             | 7                    | 11.0                       | 13.4                   | P                         | Discharged alive; died 3 days later |  |
| F      | HTN, DM, prostate cancer  | 194        | 56   |      | 0.86 |          |      |      | 502     |       |      | 0                     | NA                | 100                    | 1                             | 22                   | 12.1                       | 13.8                   | P                         | Discharged on day 23                |  |
| G      | ESRD, HTN, DM             |            | 127  | 92   | 0.5  | 37372    | 8730 |      | 1661    | 9434  |      | 0                     | NA                | 28                     | 1                             | 11                   | 8.2                        | 9.9                    | G                         | Discharged on day 12                |  |
| H      | HTN, COPD                 | 123        |      |      | 0.91 |          |      |      | 1087    |       |      | 0                     | NA                | 100                    | 1                             | 9                    | 11.2                       | 13.4                   | P                         | Dead on day 9                       |  |
| I      | DM, obesity               | 23         |      |      | 1.8  | 39       |      |      | 14257   |       |      | 0                     | NA                | 28                     | 1                             | 3                    | 8.5                        | 10.2                   | G                         | Discharged on day 5                 |  |
| J      | HTN, COPD, paraplegia     |            | 255  |      | 1.68 | 345      |      |      | 850     |       |      | 0                     | NA                | 100                    | 1                             | 15                   | 9.7                        | 12.2                   | P                         | Dead on day 15                      |  |
| K      | HTN, CHF, cirrhosis       | 154        | 84   |      | 1.42 | 434      |      |      | 2368    | 12781 |      | 3                     | Day 6             | 100                    | 1                             | 8                    | 8.6                        | 12.6                   | P                         | Dead on day 8                       |  |
| L      | HTN, DM, obesity          | 302        | 125  | 5    | 0.5  | 1054     | 1545 | 373  | 1189    | 6160  |      | 26                    | Day 6             | 100                    | 1                             | 26                   | 11.2                       | 12.9                   | P                         | Dead on day 26                      |  |
| M      | HTN                       |            | 52   | 23   | 0.98 | 1438     |      |      | 15696   | 1718  |      | 0                     | NA                | 75                     | 1                             | 5                    | 11.0                       | 11.3                   | G                         | Discharged on day 6                 |  |
| N      | DM, obesity,              | 149        | 302  | 158  | 0.67 | 639      | 808  | 552  | 814     | 33960 | 2548 | 41                    | Day 4             | 75                     | 1                             | 56                   | 13.2                       | 13.8                   | P                         | Discharged on day 57                |  |

|   |                        |     |     |     |      |      |      |      |      |      |      |    |       |     |   |    |      |      |   |                      |
|---|------------------------|-----|-----|-----|------|------|------|------|------|------|------|----|-------|-----|---|----|------|------|---|----------------------|
|   | sickle cell trait      |     |     |     |      |      |      |      |      |      |      |    |       |     |   |    |      |      |   |                      |
| O | HTN, DM, obesity       | 22  | 65  | 119 | 0.99 | 1835 | 4131 | 5602 | 1700 | 7338 | 5264 | 13 | Day 4 | 100 | 1 | 16 | 13.0 | 15.3 | P | Died on day 16       |
| P | No comorbid conditions |     | 138 |     | 0.42 | 751  |      |      | 1044 | 916  | 529  | 0  | NA    | 70  | 1 | 14 | 12.0 | 12.8 | P | Discharged on day 15 |
| Q | HTN, DM, obesity       | 231 | 80  |     | 0.67 | 2175 | 1297 |      | 1079 | 6016 |      | 0  | NA    | 100 | 1 | 20 | 13.1 | 14.8 | P | Discharged on day 21 |
| R | CHF, CAD               | 129 |     |     | 0.86 | 4160 |      |      | 1331 |      |      | 0  | NA    | 100 | 1 | 4  | 9.0  | 10.1 | G | Discharged on day 5  |

**Legend:**

D – Day(s); Day 01 is the day of admission.

Pred – Predictions

G – Good prognosis

P – Poor prognosis

MV - Mechanical ventilation

CRP range (healthy people): <5mg/l

ALC range (healthy people): 1 – 4.8k/μl

D-dimer range (healthy people): <500ng/ml

Ferritin range (healthy people): 10 – 291ng/ml

**Supplemental Table S3: GO Annotations for APOBEC3H**

| Aspect             | Function*                                                                                         |
|--------------------|---------------------------------------------------------------------------------------------------|
| Cellular Component | Cytoplasm                                                                                         |
| Cellular Component | Nucleus                                                                                           |
| Molecular function | Cytidine deaminase activity                                                                       |
| Molecular function | Deoxycytidine deaminase activity                                                                  |
| Molecular function | RNA binding                                                                                       |
| Molecular function | Zinc ion binding                                                                                  |
| Biological process | Cytidine to uridine editing                                                                       |
| Biological process | Defense response to virus                                                                         |
| Biological process | DNA cytosine deamination                                                                          |
| Biological process | DNA demethylation                                                                                 |
| Biological process | Innate immune response                                                                            |
| Biological process | Negative regulation of single stranded viral RNA replication via double stranded DNA intermediate |
| Biological process | Negative regulation of transposition                                                              |
| Biological process | Negative regulation of viral process                                                              |

## Negative regulation of viral genome by APOBEC3H

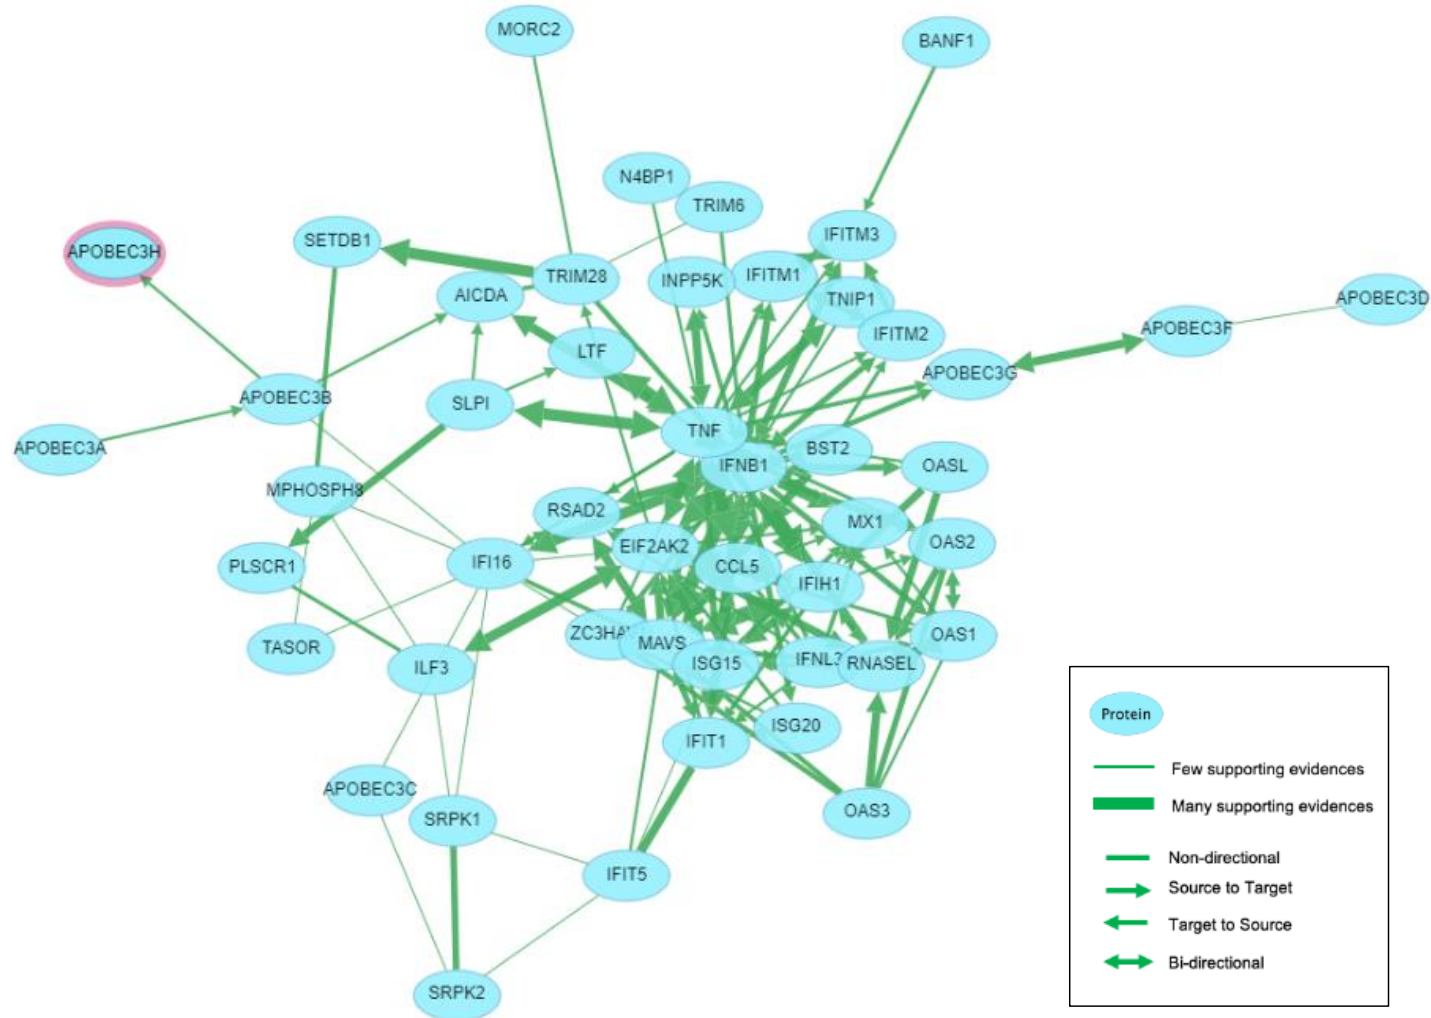

**Supplemental Figure S7.** Pathway map showing the negative regulation of viral genome by APOBEC3H. This network was assembled automatically by INDRA (<http://indra.bio>) by processing all available biomedical literature with multiple machine reading systems and integrating curated pathway databases. The network represents mechanistic interactions between genes/proteins that are associated with this GO process.
